# Supplementary material
Source: PubMed Central journal article supplement (PMC2656404)
Supplement: NIHMS70876-supplement-1.pdf [file NIHMS70876-supplement-1.pdf]

## **SUPPLEMENTARY MATERIALS**

Figure S1. Serum TNFR protein levels after intramuscular administration of AAV2/1-TNFR:Fc vector to rats afflicted with *Pg*-LPS experimental periodontitis. Four weeks prior to disease induction, animals were administrated intramuscularly with  $10^{11}$  DRP of AAV2/1-TNFR:Fc vector. Serum levels ( $\mu\text{g/mL}$ ) of TNFR protein were monitored, at the timepoints indicated, using ELISA. The data are expressed as the means  $\pm$  SD (n=5/group/timepoint). \* Statistically different from other groups at the same timepoint (One-way ANOVA and Tukey's *post hoc*).

**Supplementary information is available at *Gene Therapy*'s website.**
